# Supplementary material
Source: publisher figshare collection journal article supplement (https://acs.figshare.com/ndownloader/files/31252794)
Supplement: Supplementary file 1 [file 31252794]

Compound ID	SMILES	IC50 �M
1	OC1=CC=C(C(CN2C=NC3=C2C=C(C(N[C@@H](CCC(N)=O)C(NC4=CC=CC(OC5=CC=CC=C5)=C4)=O)=O)C=C3)=O)C=C1O	0.84
2	OC1=CC=C(C(CN2C=NC3=C2C=C(C(N[C@H](CCC(N)=O)C(NC4=CC=CC(OC5=CC=CC=C5)=C4)=O)=O)C=C3)=O)C=C1O	5
3	OC1=CC=C(C(CN2C=NC3=C2C=C(C(N[C@@H](CCC(N)=O)C(NC4=CC=C(C5=CN=CC=N5)C=C4C)=O)=O)C=C3)=O)C=C1O	2.5
4	OC1=CC=C(C(CN2C=NC3=C2C=C(C(N[C@H](CCC(N)=O)C(NC4=CC=C(C5=CN=CC=N5)C=C4C)=O)=O)C=C3)=O)C=C1O	2.4
5	O=C(N)[C@H](CCCCN)NC(CNC(CC[C@@H](C(NC1=CC(C)=C(Br)C=C1)=O)NC(CC(C)(C)CC(O)=O)=O)=O)=O	>20
6	O=C(N)[C@H](CCCCN)NC([C@H](CCC(O)=O)NC(CNC(CC[C@H](C(NC1=CC(C)=C(Br)C=C1)=O)NC(CC(C)(C)CC(O)=O)=O)=O)=O)=O	>20
7	O=C(N)[C@H](CCCCN)NC(CNC(CC[C@@H](C(NCCCSCC1=CC=C(F)C=C1)=O)NC(CCN2[C@H](C)CCC[C@@H]2C)=O)=O)=O	>20
8	O=C(N)[C@H](CCCCN)NC([C@H](CCC(O)=O)NC(CNC(CC[C@H](C(NCCCSCC1=CC=C(F)C=C1)=O)NC(CCN2[C@H](C)CCC[C@@H]2C)=O)=O)=O)=O	16
9	O=C(O)[C@H](CC1=C(C2=CC(C(Cl)=CC=C3)=C3N2C(OC(C)(C)C)=O)C=CC=C1)NC(C4=CN=C(C=CC=C5)N5C4=O)=O	4
10	O=C(O)[C@@H](CC1=C(C2=CC(C(Cl)=CC=C3)=C3N2C(OC(C)(C)C)=O)C=CC=C1)NC(C4=CN=C(C=CC=C5)N5C4=O)=O	13
11	O=C(C1=NN(C)C(C)=C1Br)N[C@H](C(O)=O)CC2=CC=C(C#CCNC(NC3=CC=C(C)C=C3)=O)C=C2	19
12	O=C(C1=NN(C)C(C)=C1Br)N[C@@H](C(O)=O)CC2=CC=C(C#CCNC(NC3=CC=C(C)C=C3)=O)C=C2	>20
13	O=C(CC1C(C=CC(C)=C2)=C2NC1=O)N[C@H](C(O)=O)CC3=CC=C(C4=C(C(F)(F)F)C=C(Cl)C=C4)C=C3	0.24
14	O=C(CC1C(C=CC(C)=C2)=C2NC1=O)N[C@H](C(OC)=O)CC3=CC=C(C4=C(C(F)(F)F)C=C(Cl)C=C4)C=C3	3.9
15	O=C(C1=NNC(C2=CC=C(C)O2)=C1)N[C@H](C(O)=O)CC3=CC(C4=CC(Cl)=C(OC)C(Cl)=C4)=CC=C3	0.13
16	O=C(C1=NNC(C2=CC=C(C)O2)=C1)N[C@@H](C(O)=O)CC3=CC(C4=CC(Cl)=C(OC)C(Cl)=C4)=CC=C3	0.032
17	NCCOCCOCCNC([C@@H](CC1=CC(C(C=C2Cl)=CC(Cl)=C2OC)=CC=C1)NC(C3=NNC(C4=CC=C(O4)C)=C3)=O)=O	n.a.
18	COC(C(Cl)=CC(C1=CC=CC(C[C@H](C(NCCOCCOCCNC(NC2=CC(C(O)=O)=C(C3=C(C=C4)C(OC5=C3C=CC(O)=C5)=CC4=O)C=C2)=S)=O)NC(C6=NNC(C7=CC=C(O7)C)=C6)=O)=C1)=C8)=C8Cl	n.a.
19	NCCOCCOCCNC(NC1=CC(C(O)=O)=C(C2=C(C=C3)C(OC4=C2C=CC(O)=C4)=CC3=O)C=C1)=S	n.a.
